# Supplementary material
Source: Frontiers journal article supplement (https://www.frontiersin.org/articles/353894)
Supplement: Table_1.pdf [file Table_1.pdf]

**TABLE S1 | Size and zeta potential of G10E-CS, CS and G10E<sup>a</sup>.**

|         | Size(nm)    | Pdi <sup>b</sup> | Zeta potential(mV) |
|---------|-------------|------------------|--------------------|
| CS      | 1250 ± 280  | 0.169            | + 37.1 ± 5.2       |
| G10E    | 0.41 ± 0.08 | 0.171            | - 31.7 ± 9.1       |
| CS-G10E | 1283 ± 310  | 0.448            | + 36.0 ± 5.48      |

<sup>a</sup>Size and zeta potential of chitosan microspheres loaded with G10E peptides (G10E-CS), chitosan microspheres (CS) and G10E peptides. G10E-CS are chitosan microspheres prepared by emulsion cross-linking with G10E peptides in their core. The particle size and zeta potential of microspheres was determined in triplicate by Marvin particle size potentiometer.

<sup>b</sup>pdi: polydispersity index.

Data represent the mean ± SD.
